# Supplementary material for: Central Recruitment mechanism of Itch and Pain Through the Paraventricular Thalamic Nucleus in a Pathway- and Intensity-Dependent Manner
Source: Research Square preprint supplement (doi:10.21203/rs.3.rs-5615052/v1), 2025-01-20
Supplement: Supplementary file 1 [file cba690ae972b1c6b6f501add.pdf]

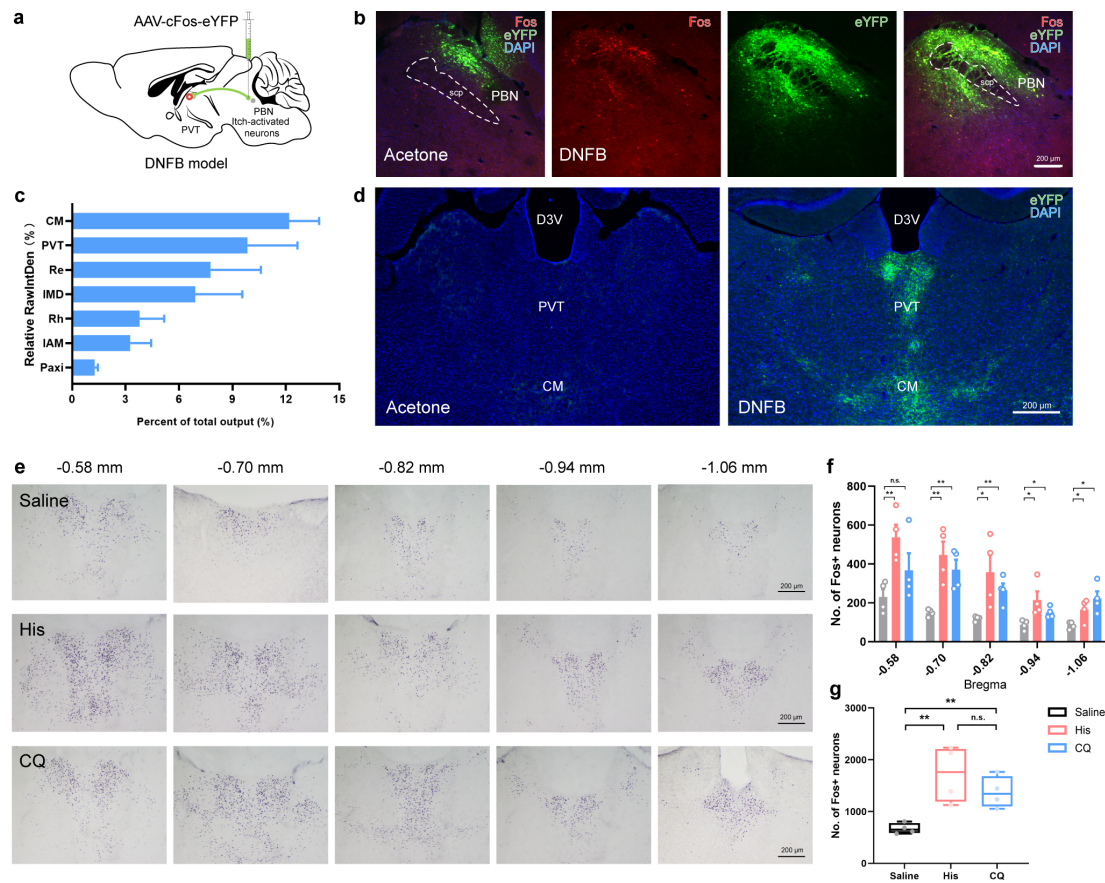

**Figure S1. The participation of the PVT in itch modulation process.**

- a**, Schematic diagram of virus injection into the PBN performed with DNFB model.
- b**, Injection sites depicting the location of itch-activated AAV virus (green) and Fos-immunoreactive (red) neurons with DAPI delineating the PBN. Scale bar: 200  $\mu$ m.
- c**, Percentages of the eGFP-labeled fibers and terminals from the midline nuclei in the total output in the thalamus (n=3).
- d**, The distribution pattern of the eGFP-labeled terminals in Acetone and DNFB groups. Scale bar: 200  $\mu$ m.
- e**, The Fos distribution pattern in PVT from mice applied with Saline, His or CQ. Scale bars: 200  $\mu$ m.
- f**, Summary data of the Fos<sup>+</sup> neurons in representative bregma of PVT. Two-tailed unpaired Student's t-test: bregma = -0.58 mm,  $P = 0.007$  for Saline vs. His,  $P = 0.2055$  for Saline vs. CQ; bregma = -0.70 mm,  $P = 0.0052$  for Saline vs. His,  $P = 0.0054$  for Saline vs. CQ; bregma = -0.82 mm,  $P = 0.0369$  for Saline vs. His,  $P = 0.0064$  for Saline vs. CQ; bregma = -0.94 mm,  $P = 0.0348$  for Saline vs. His,  $P = 0.0154$  for Saline vs. CQ; bregma = -1.06 mm,  $P = 0.0361$  for Saline vs. His,  $P = 0.012$  for Saline vs. CQ.

**g**, Summary data of Fos<sup>+</sup> neurons in mice applied with Saline (n=4), His (n=4) or CQ (n=4). Two-tailed unpaired Student's t-test:  $P = 0.0093$  for Saline vs. His,  $P = 0.0047$  for Saline vs. CQ,  $P = 0.3124$  for His vs. CQ.

Data are presented as the boxplot or mean  $\pm$  SEM. n.s.: no significance,  $*P < 0.05$ ,  $**P < 0.01$ . CM: Central medial thalamic nucleus. Re: Reuniens thalamic nucleus, IMD: Intermediodorsal thalamic nucleus, Rh: rhomboid thalamic nucleus, IAM: Interanteromedial thalamic nucleus, Paxi: paraxiphoid nucleus of thalamus, scp: Superior cerebellar pedduncle, D3V: Dorsal 3rd ventricle, DNFB: 1-fluoro-2,4-dinitrobenzene.

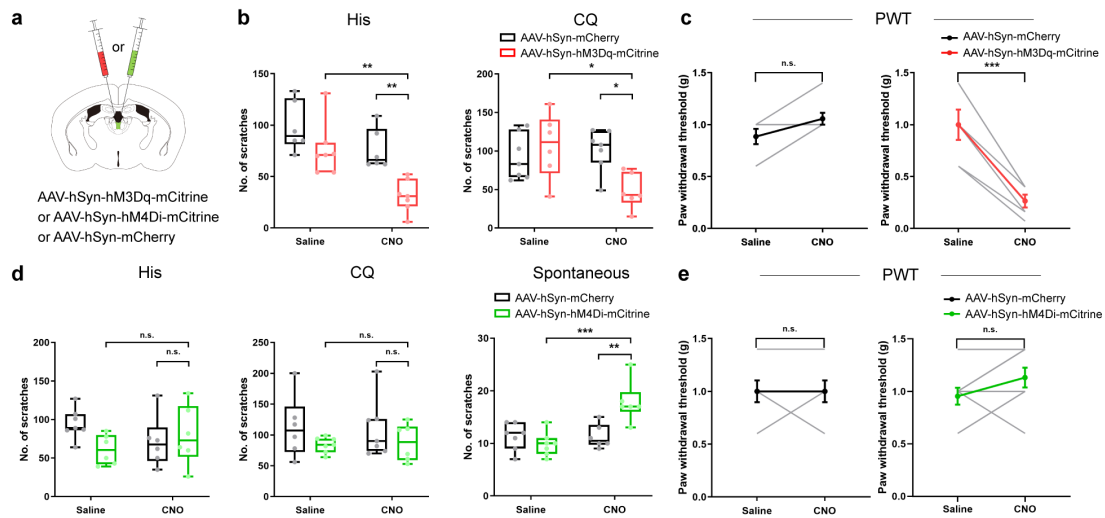

**Figure S2. Chemogenic PVT activation attenuated scratching behavior yet induced allodynia.**

**a**, Schematic diagram of the PVT chemogenic activation or inhibition.

**b**, PVT activation significantly suppressed the number of scratches in both His- and CQ-induced acute itch models ( $n = 6-7$ ). Left: His-induced itch, interaction effect  $F_{(1,22)} = 1.752$ ,  $P = 0.1992$ ,  $P = 0.0042$  for hM3Dq-expressing mice with Saline vs. CNO,  $P = 0.0064$  for CNO-treated mice with mCherry vs. hM3Dq. Right: CQ-induced itch, interaction effect  $F_{(1,22)} = 7.629$ ,  $P = 0.0114$ ,  $P = 0.0179$  for hM3Dq-expressing mice with Saline vs. CNO,  $P = 0.0272$  for CNO-treated mice with mCherry vs. hM3Dq.

**c**, Paw withdrawal threshold decreased after chemogenic PVT activation in naive mice ( $n = 6-7$ ). Left:  $P = 0.0781$  for mCherry control mice with Saline vs. CNO; Right:  $P = 0.0007$  for hM3Dq-expressing mice with Saline vs. CNO.

**d**, Summary data of PVT chemogenic inhibition in acute and spontaneous itch ( $n=6-7$ ). Left: His-induced itch, interaction effect  $F_{(1,21)} = 3.339$ ,  $P = 0.0819$ ,  $P = 0.6758$  for hM4Di-expressing mice with Saline vs. CNO,  $P = 0.9547$  for CNO-treated mice with mCherry vs. hM4Di. Middle: CQ-induced itch, interaction effect  $F_{(1,22)} = 0.04771$ ,  $P = 0.8291$ ,  $P = 0.998$  for hM4Di-expressing mice with Saline vs. CNO,  $P = 0.7176$  for CNO-treated mice with mCherry vs. hM4Di. Right: Spontaneous itch, interaction effect  $F_{(1,22)} = 12.95$ ,  $P = 0.0016$ ,  $P = 0.0002$  for hM4Di-expressing mice with Saline vs. CNO,  $P = 0.0030$  for CNO-treated mice with mCherry vs. hM4Di.

**e**, Summary data of PVT chemogenic inhibition in PWT ( $n=6-9$ ). Left:  $P > 0.9999$  for mCherry control mice with Saline vs. CNO. Right:  $P = 0.1038$  for hM4Di-expressing mice with Saline vs. CNO.

Data are presented as the boxplot or mean  $\pm$  SEM. n.s.: no significance,  $*P < 0.05$ ,  $**P < 0.01$ ,  $***P < 0.001$ . Two-way ANOVA with Tukey's multiple comparison tests for **b** and **d**, and two-tailed, paired,

Student's t-test for **c** and **e**.

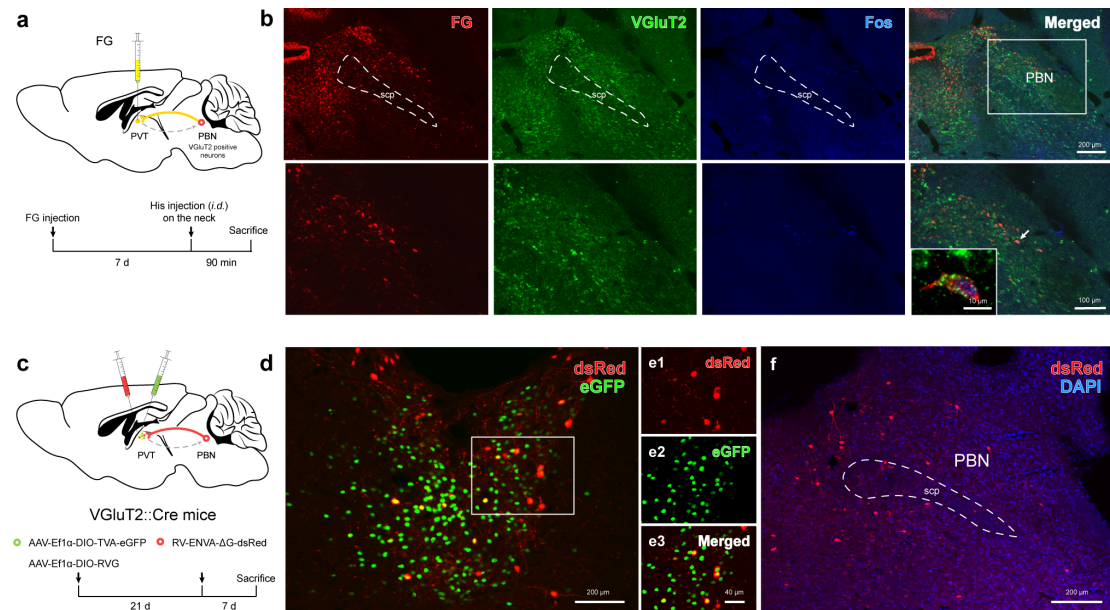

**Figure S3. The glutamatergic nature of the PBN-PVT projection.**

**a**, Schematic diagram and time line of the FG injection into the PVT.

**b**, Representative images of Fos immunoreactivity (blue) in VGluT2 mRNA positive (green) and FG-labeled neurons (red). White square is enlarged and VGluT2 mRNA-/Fos-/FG-triple-labeled neurons pointed with white arrow is displayed as insert image. Scale bars: 200  $\mu$ m (upper), 100  $\mu$ m (lower) and 10  $\mu$ m (insert).

**c**, Schematic diagram of RV-virus injection into the PVT of VGluT2::Cre mouse.

**d-e**, Representative images of PVT neurons expressing RV virus. White square is enlarged and neurons co-expressed with rabies-dsRed (red) and eGFP (green) were identified as starter cells. Scale bars: 200  $\mu$ m (**d**) and 40  $\mu$ m (**e**).

**f**, Representative image showing retrograde labeling in the PBN. Scale bar: 200  $\mu$ m.



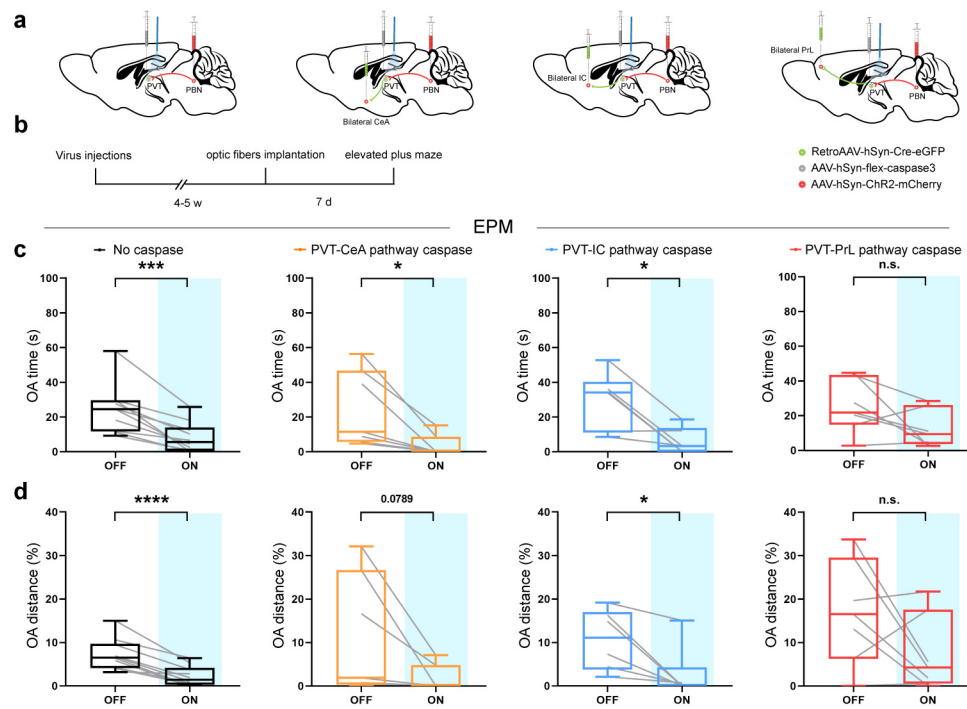

**Figure S4. Distinct modulatory effects of different PBN-PVT downstream pathways in EPM.**

**a-b**, The schematic diagram and time line indicating the virus strategy for PBN-PVT pathway-specific excitation with caspase-induced  $PVT^{CeA}$ ,  $PVT^{IC}$  or  $PVT^{PrL}$  apoptosis.

**c**, Statistics of the time spent in open arm (OA time) after the PBN-PVT pathway activation with or without  $PVT^{CeA}$ ,  $PVT^{IC}$  or  $PVT^{PrL}$  neurons. No caspase:  $n=10$ , light-off vs. light-on,  $P = 0.0003$ ;  $PVT^{CeA}$  caspase:  $n=7$ , light-off vs. light-on,  $P = 0.0192$ ;  $PVT^{IC}$  caspase:  $n=6$ , light-off vs. light-on,  $P = 0.0173$ ;  $PVT^{PrL}$  caspase:  $n=7$ , light-off vs. light-on,  $P = 0.0989$ .

**d**, The modulatory effects of the PBN-PVT pathway activation with or without  $PVT^{CeA}$ ,  $PVT^{IC}$  or  $PVT^{PrL}$  in the percentages of distance traveled in open arm (OA distance). No caspase:  $n=10$ , light-off vs. light-on,  $P < 0.0001$ ;  $PVT^{CeA}$  caspase:  $n=7$ , light-off vs. light-on,  $P = 0.0789$ ;  $PVT^{IC}$  caspase:  $n=6$ , light-off vs. light-on,  $P = 0.0251$ ;  $PVT^{PrL}$  caspase:  $n=7$ , light-off vs. light-on,  $P = 0.1355$ .

Data are presented as boxplot. n.s.: no significance, \* $P < 0.05$ , \*\*\* $P < 0.001$ , \*\*\*\* $P < 0.0001$ . Two-tailed, paired, Student's t-test for **c** and **d**.

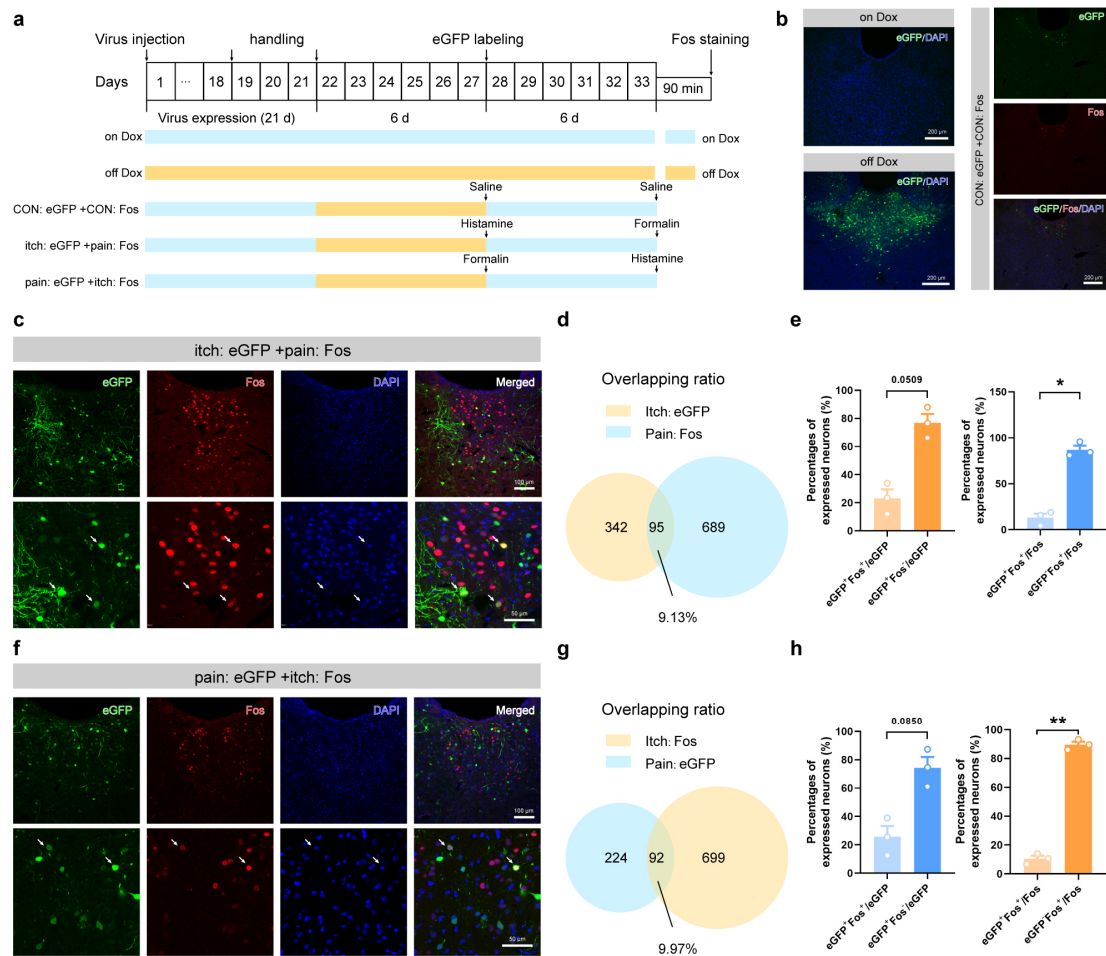

**Figure S5. The itch- and pain-activated neurons in the PVT with little overlapping.**

**a**, The virus strategy, time line and experimental design for labeling itch- and pain-activated neurons in the PVT.

**b**, Representative images of eGFP expression with or without doxycycline (Dox) and in CON: eGFP + CON: Fos group. Scale bars: 200  $\mu$ m.

**c**, Representative images of endogenous Fos activated by pain (red) that co-labeled with eGFP<sup>+</sup> itch-activated neurons (green) in the PVT. Scale bars: 100  $\mu$ m (upper) and 50  $\mu$ m (lower).

**d**, Overlapping ratio of pain-activated (Fos<sup>+</sup>) and itch-activated (eGFP<sup>+</sup>) neurons in the PVT.

**e**, Percentages of double-labeled neurons among eGFP<sup>+</sup> and Fos<sup>+</sup> neurons were lower than that of single-labeled neurons. Left: eGFP<sup>+</sup>Fos<sup>+</sup>/eGFP vs. eGFP<sup>+</sup>Fos<sup>-</sup>/eGFP,  $P = 0.0509$ . Right: eGFP<sup>+</sup>Fos<sup>+</sup>/Fos vs. eGFP<sup>+</sup>Fos<sup>-</sup>/Fos,  $P = 0.0141$ .

**f**, Representative images of endogenous Fos activated by itch (red) that co-labeled with eGFP<sup>+</sup> pain-activated neurons (green) in the PVT. Scale bars: 100  $\mu$ m (upper) and 50  $\mu$ m (lower).

**g**, Overlapping ratio of pain-activated (eGFP<sup>+</sup>) and itch-activated (Fos<sup>+</sup>) neurons in the PVT.

**h**, Percentages of double-labeled neurons among eGFP<sup>+</sup> and Fos<sup>+</sup> neurons were lower than that of single-labeled neurons. Left: eGFP<sup>+</sup>Fos<sup>+</sup>/eGFP vs. eGFP<sup>+</sup>Fos<sup>-</sup>/eGFP,  $P = 0.0850$ . Right: eGFP<sup>+</sup>Fos<sup>+</sup>/Fos vs. eGFP<sup>+</sup>Fos<sup>+</sup>/Fos,  $P = 0.0027$ .

Data are presented as mean  $\pm$  S.E.M. \* $P < 0.05$ , \*\* $P < 0.01$ . Two-tailed, paired, Student's t-test for **e** and

**h**. CON: control group.

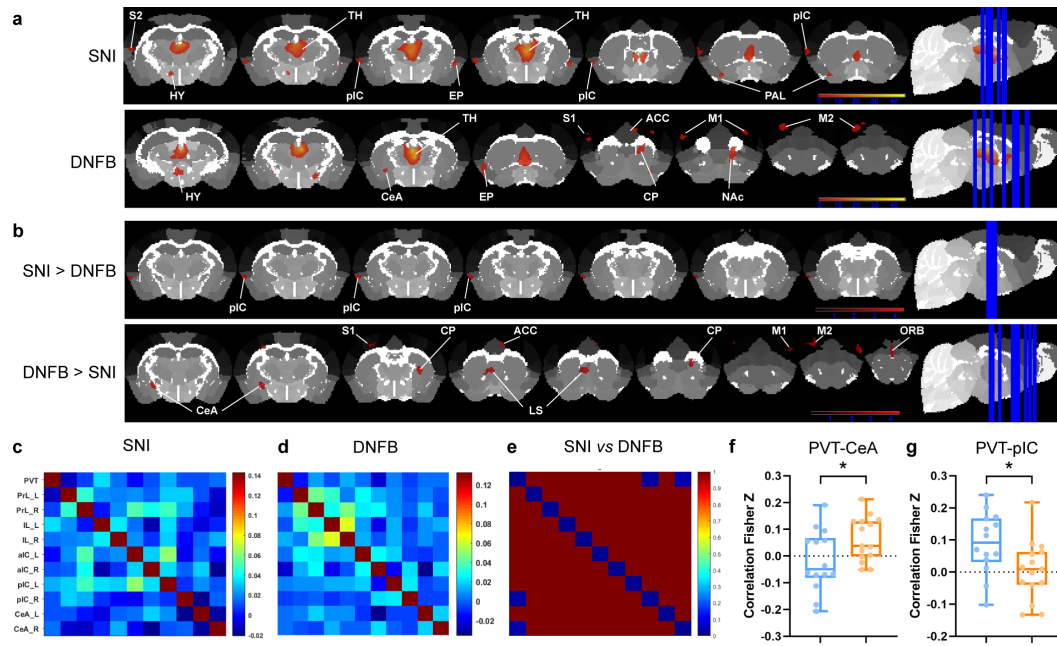

**Figure S6. Differences in functional connectivity between the SNI and DNFB models.**

**a-b**, Voxel-wise FC analysis with the PVT seed in the SNI and DNFB groups and corresponding difference maps between the groups (SNI,  $n=14$ ; DNFB,  $n=15$ ). Red/orange represents anatomical location of voxels with increased FC. The color bars represent  $T$  values. One-tailed unpaired Student's  $t$ -test for **a** and Two-tailed unpaired Student's  $t$ -test for **b**, uncorrected  $P < 0.005$ , minimal cluster size 50 voxels.

**c-e**, ROI-wise FC analysis among the PVT, bilateral PrL, IL, aIC, pIC and CeA. **c-d**, Mean correlation coefficients in the SNI (**c**) and DNFB (**d**) groups. **e**, Comparisons between the groups revealed different FC between the PVT with pIC and CeA. Two-tailed unpaired Student's  $t$ -test for **e**, uncorrected  $P < 0.05$ .

**f-g**, Regional quantification of the mean FC  $Z$  values revealed the significantly different FC between SNI and DNFB groups. Two-tailed unpaired Student's  $t$ -test for **f** and **g**, uncorrected  $P < 0.05$ .

Data are presented as boxplot.  $*P < 0.05$ . M1: Primary motor area, M2: Secondary motor area, S1: Primary somatosensory area, S2: Supplemental somatosensory area, aIC: Insular area, anterior part, pIC: Insular area, posterior part, ACC: Anterior cingulate cortex, ORB: Orbital area, EP: Endopiriform nucleus, PAL: Pallidum, CP: Caudoputamen, NAc: Nucleus accumbens, LS: Lateral septal nucleus, CeA:

Central amygdala nucleus, HY: Hypothalamus, TH: Thalamus.

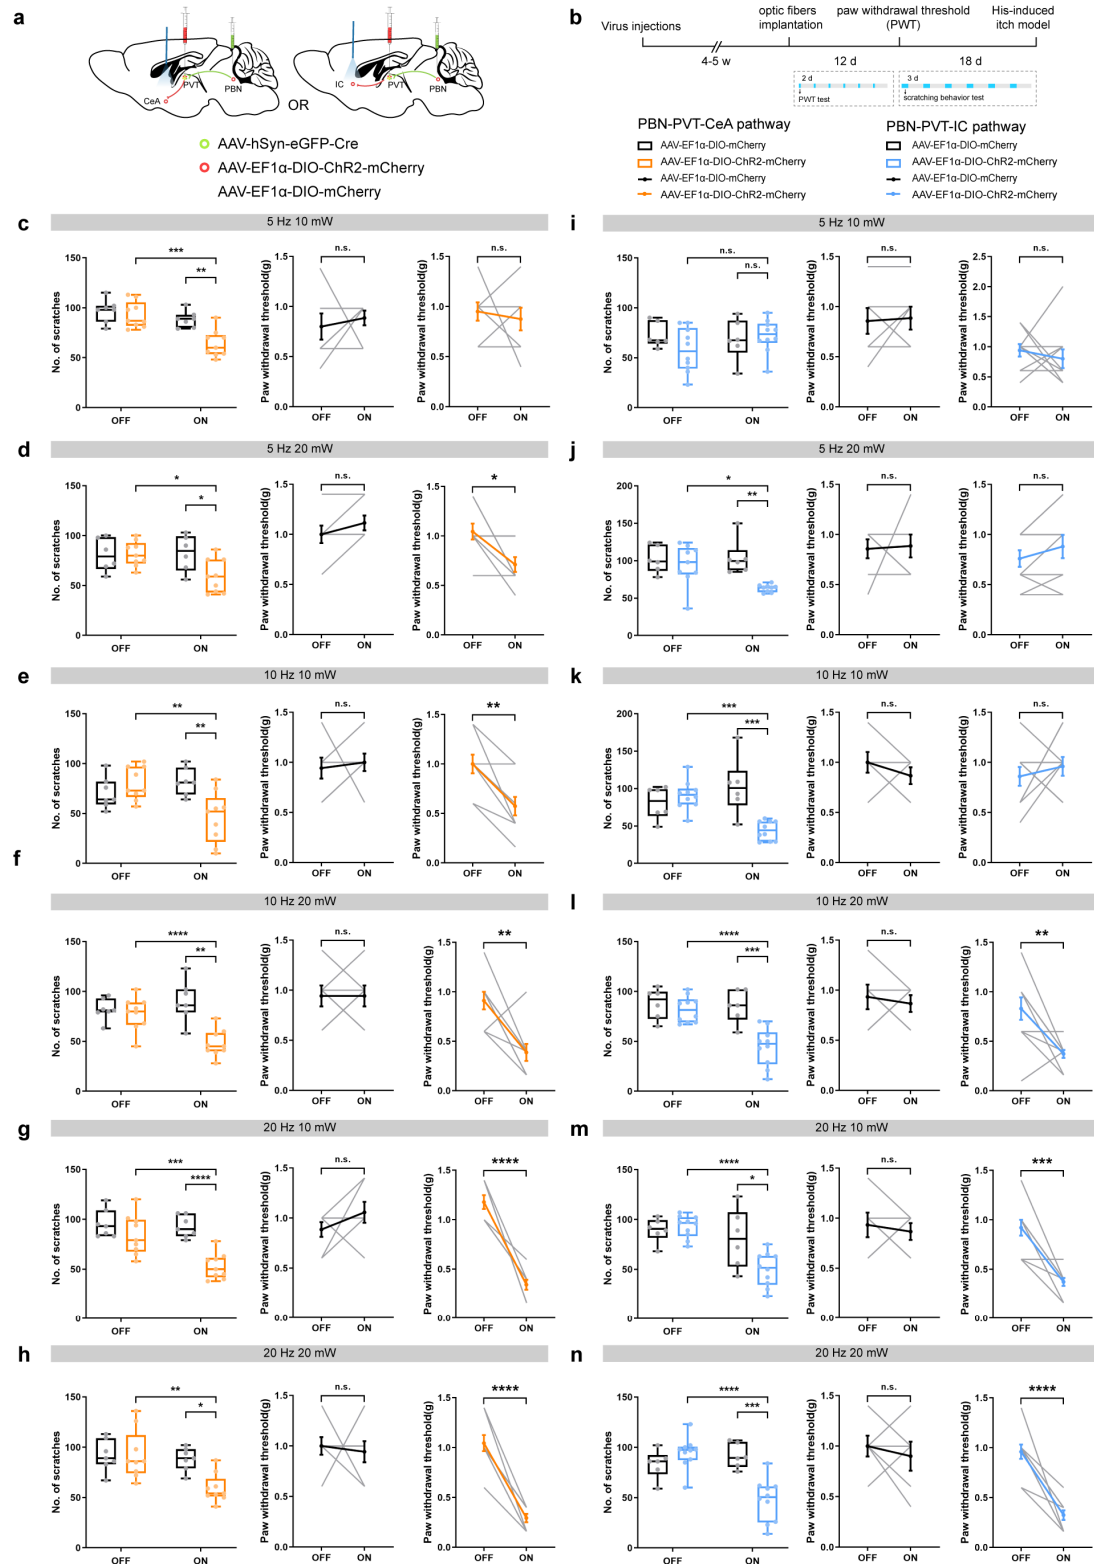

**Figure S7. The modulatory effects of the PBN-PVT-CeA/IC pathways are intensity-dependent.**

**a-b**, Schematic diagram of virus injection and optic fibers implantation to activate the PBN-PVT-CeA and PBN-PVT-IC pathway, respectively.

**c-h**, Statistics of the No. of scratches (left) and PWT (middle and right) with the PBN-PVT-CeA pathway light stimulation under various stimulation patterns. **c**, Light stimulated with 5Hz, 10mW, (left) No. of scratches,  $n = 7-9$ ,  $F_{(1,28)} = 5.858$ ,  $P = 0.0222$ ,  $P = 0.0001$  for ChR2-expressing mice with light-off vs. light-on,  $P = 0.0019$  for mCherry vs. ChR2 during light-on. PWT, (middle)  $n = 7$ ,  $P = 0.6394$  for mCherry control mice with light-off vs. light-on, (right)  $n = 8$ ,  $P = 0.6537$  for ChR2-expressing mice with light-off vs. light-on. **d**, 5Hz, 20mW, (left)  $n = 6-9$ ,  $F_{(1,26)} = 4.162$ ,  $P = 0.0516$ ,  $P = 0.0281$  for light-off vs. light-on,  $P = 0.0477$  for mCherry vs. ChR2 during light-on; (middle)  $n = 7$ ,  $P = 0.1723$  for light-off vs. light-on; (right)  $n = 9$ ,  $P = 0.0203$  for light-off vs. light-on. **e**, 10Hz, 10mW, (left)  $n = 7-8$ ,  $F_{(1,28)} = 11.54$ ,  $P = 0.0021$ ,  $P = 0.0033$  for light-off vs. light-on,  $P = 0.0038$  for mCherry vs. ChR2 during light-on; (middle)  $n = 7$ ,  $P = 0.7358$  for light-off vs. light-on; (right)  $n = 9$ ,  $P = 0.0016$  for light-off vs. light-on. **f**, 10Hz, 20mW, (left)  $n = 7-9$ ,  $F_{(1,28)} = 11.86$ ,  $P = 0.0018$ ,  $P = 0.0018$  for light-off vs. light-on,  $P < 0.0001$  for mCherry vs. ChR2 during light-on; (middle)  $n = 7$ ,  $P > 0.9999$  for light-off vs. light-on; (right)  $n = 9$ ,  $P = 0.0056$  for light-off vs. light-on. **g**, 20Hz, 10mW, (left)  $n = 7-9$ ,  $F_{(1,28)} = 7.000$ ,  $P = 0.0132$ ,  $P = 0.0008$  for light-off vs. light-on,  $P < 0.0001$  for mCherry vs. ChR2 during light-on; (middle)  $n = 7$ ,  $P = 0.2894$  for light-off vs. light-on; (right)  $n = 9$ ,  $P < 0.0001$  for light-off vs. light-on. **h**, 20Hz, 20mW, (left)  $n = 7-9$ ,  $F_{(1,28)} = 5.540$ ,  $P = 0.0258$ ,  $P = 0.0023$  for light-off vs. light-on,  $P = 0.0133$  for mCherry vs. ChR2 during light-on; (middle)  $n = 7$ ,  $P = 0.7663$  for light-off vs. light-on; (right)  $n = 9$ ,  $P < 0.0001$  for light-off vs. light-on.

**i-n**, Statistics of the No. of scratches (left) and PWT (middle and right) with the PBN-PVT-IC pathway light stimulation under various stimulation patterns. **i**, Light stimulated with 5Hz, 10mW, (left) No. of scratches,  $n = 6-10$ ,  $F_{(1,28)} = 1.922$ ,  $P = 0.1765$ ,  $P = 0.3301$  for ChR2-expressing mice with light-off vs. light-on,  $P = 0.9823$  for mCherry vs. ChR2 during light-on. PWT, (middle)  $n = 7$ ,  $P = 0.8461$  for mCherry control mice with light-off vs. light-on, (right)  $n = 10$ ,  $P = 0.5152$  for ChR2-expressing mice with light-off vs. light-on. **j**, 5Hz, 20mW, (left)  $n = 6-9$ ,  $F_{(1,26)} = 4.988$ ,  $P = 0.0343$ ,  $P = 0.0145$  for light-off vs. light-on,  $P = 0.0039$  for mCherry vs. ChR2 during light-on; (middle)  $n = 7$ ,  $P = 0.877$  for light-off vs. light-on; (right)  $n = 10$ ,  $P = 0.1114$  for light-off vs. light-on. **k**, 10Hz, 10mW, (left)  $n = 6-10$ ,  $F_{(1,28)} = 17.47$ ,  $P = 0.0003$ ,  $P = 0.0004$  for light-off vs. light-on,  $P = 0.0001$  for mCherry vs. ChR2 during light-on; (middle)  $n = 6$ ,  $P = 0.3632$  for light-off vs. light-on; (right)  $n = 10$ ,  $P = 0.5505$  for light-off vs. light-on. **l**, 10Hz, 20mW, (left)  $n = 6-10$ ,  $F_{(1,28)} = 8.737$ ,  $P = 0.0063$ ,  $P < 0.0001$  for light-off vs. light-on,  $P < 0.0002$  for mCherry vs. ChR2 during light-on; (middle)  $n = 6$ ,  $P = 0.6952$  for light-off vs. light-on; (right)  $n = 10$ ,  $P$



= 0.0048 for light-off vs. light-on. **m**, 20Hz, 10mW, (left)  $n=6-10$ ,  $F_{(1,28)}=6.962$ ,  $P=0.0134$ ,  $P<0.0001$  for light-off vs. light-on,  $P=0.0116$  for mCherry vs. ChR2 during light-on; (middle)  $n=6$ ,  $P=0.6952$  for light-off vs. light-on; (right)  $n=10$ ,  $P=0.0002$  for light-off vs. light-on. **n**, 20Hz, 20mW, (left)  $n=7-9$ ,  $F_{(1,28)}=19.74$ ,  $P=0.0001$ ,  $P<0.0001$  for light-off vs. light-on,  $P=0.0002$  for mCherry vs. ChR2 during light-on; (middle)  $n=6$ ,  $P=0.5965$  for light-off vs. light-on; (right)  $n=10$ ,  $P<0.0001$  for light-off vs. light-on.

Data are presented as the boxplot or mean  $\pm$  SEM. n.s.: no significance,  $*P<0.05$ ,  $**P<0.01$ ,  $***P<0.001$ ,  $****P<0.0001$ . Two-tailed, paired, Student's t-test for PWT test in **c-n**, and two-way ANOVA with Tukey's multiple comparison tests for No. of scratches in **c-n**.

**Supplementary table 1.** Viruses and drugs utilized for morphological and behavioral experiments

|                                      | Experimental<br>purposes  | Viruses/Drugs                              | Location/<br>Target nuclei | Volume     | Serotype     | Serial<br>Number |
|--------------------------------------|---------------------------|--------------------------------------------|----------------------------|------------|--------------|------------------|
| <b>Morphological<br/>experiments</b> | Fos expression            | His/CQ/Saline                              | nape                       | 15 $\mu$ l |              |                  |
|                                      |                           | Formalin                                   | planter                    | 15 $\mu$ l |              |                  |
|                                      | Retrograde<br>tracing     | Acetone/DNFB                               | nape                       |            |              |                  |
|                                      |                           | AAV-cFos-tTA-NLS-FLAG                      | PVT                        | 100 nl     | AAV2/9       | BC221118-0058-9  |
|                                      |                           | AAV-TRE-tight-eGFP                         | PVT                        | 100 nl     | AAV2/9       | BC230804-2296-9  |
|                                      |                           | 4% Fluoro-gold (FG)                        | PVT                        | 20 nl      |              |                  |
|                                      |                           | 4% Fluoro-gold (FG)                        | right CeA, IC, PrL         | 20 nl      |              |                  |
|                                      |                           | 594-Retrobeads                             | right CeA                  | 150 nl     |              |                  |
|                                      |                           | CTB                                        | right IC                   | 150 nl     |              |                  |
|                                      |                           | 488-Retrobeads                             | CeA, IC, PrL               | 150 nl     |              |                  |
|                                      |                           | AAV-Efl $\alpha$ -DIO-TVA-eGFP             | PVT                        | 150 nl     | AAV2/9       | PT-0021          |
|                                      |                           | AAV-Efl $\alpha$ -DIO-RVG                  | PVT                        | 150 nl     | AAV2/8       | PT-0023          |
|                                      |                           | RV-ENVA- $\Delta$ G-dsRed                  | PVT                        | 150 nl     |              | R01002           |
|                                      | Anterograde<br>tracing    | AAV-cFos-eYFP                              | right PBN                  | 150 nl     | AAV2/9       | PT-0129          |
|                                      |                           | AAV-CMV bGlobin-Cre-mCherry                | PBN                        | 150 nl     | AAV2/1       | S0702-1          |
|                                      |                           | AAV-hSyn-DIO-eGFP                          | PVT                        | 150 nl     | AAV2/9       | PT-1103          |
| <b>Behavioral<br/>experiments</b>    | Baseline                  | His/CQ/Saline                              | nape                       | 15 $\mu$ l |              |                  |
|                                      |                           | Acetone/DNFB                               | nape                       |            |              |                  |
|                                      | Fiber photometry          | AAV-hSyn-GCaMP7s                           | PVT                        | 150 nl     | AAV2/9       | PT-1890          |
|                                      | Pharmacological           | AAV-CMV bGlobin-Cre-eGFP                   | PVT                        | 150 nl     | AAV2/2 Retro | S0231-2          |
|                                      | manipulation              | AAV-hSyn-DIO-hM3Dq-mCherry                 | Bilateral PBN              | 150 nl     | AAV2/9       | PT-0019          |
|                                      |                           | AAV-hSyn-DIO-hM4Di-mCherry                 | Bilateral PBN              | 150 nl     | AAV2/9       | PT-0020          |
|                                      |                           | AAV-hSyn-DIO-mCherry                       | Bilateral PBN              | 150 nl     | AAV2/9       | PT-0115          |
|                                      |                           | AAV-hSyn-hM3Dq-mCitrine                    | PVT                        | 100 nl     | AAV2/9       | H3451            |
|                                      |                           | AAV-hSyn-hM4Di-mCitrine                    | PVT                        | 100 nl     | AAV2/9       | H3452            |
|                                      |                           | AAV-hSyn-mCherry                           | PVT                        | 100 nl     | AAV2/9       | PT-0100          |
|                                      |                           | AAV-hSyn-EGFP-P2A-Cre                      | right PBN                  | 150 nl     | AAV2/1       | BC-0160          |
|                                      | manipulation              | AAV-EF1 $\alpha$ -DIO-hChR2(H134R)-mCherry | PVT                        | 150 nl     | AAV2/9       | BC-0108          |
|                                      |                           | AAV-EF1 $\alpha$ -DIO-mCherry              | PVT                        | 150 nl     | AAV2/9       | PT-0013          |
|                                      |                           | AAV-CaMKII-mCherry                         | PBN                        | 150 nl     | AAV2/9       | PT-0108          |
|                                      |                           | AAV-CMKII-ChR2-mCherry                     | PBN                        | 150 nl     | AAV2/9       | PT-0297          |
|                                      |                           | AAV-hSyn-flex-caspase3                     | PVT                        | 150 nl     | AAV2/9       | PT-0206          |
|                                      | Apoptosis<br>manipulation | AAV-hSyn-Cre-eGFP                          | Bilateral CeA, IC,<br>PrL  | 150 nl     | AAV2/R       | PT-1399          |
|                                      |                           |                                            | PBN                        | 150 nl     | AAV2/9       | PT-0150          |

\*: AAV-CMVbGlobin-Cre-mCherry were provided by Shanghai Taitool Bioscience Co. Ltd. Other viruses were provided by Wuhan Brain VTA Co. Ltd.

**Supplementary table 2.** Antisera used for FISH staining and immunofluorescent staining

| Groups                       | Primary antisera                  | Secondary antisera                         | Tertiary antisera                    |
|------------------------------|-----------------------------------|--------------------------------------------|--------------------------------------|
| <b>594-Retrobeads/CTB/FG</b> | Goat anti-CTB                     | Alexa 488 donkey anti-goat                 |                                      |
|                              | (1:500, 703, listlabs)            | (1:500, a11055, Invitrogen)                |                                      |
|                              | Rabbit anti-FG antibody           | Alexa 647 donkey anti- rabbit              |                                      |
|                              | (1:500, AB153-I, Merck Millipore) | (1:500, A31573, Invitrogen)                |                                      |
| <b>eGFP/Fos/FG</b>           | Mouse anti-Fos                    | Alexa 647 donkey anti- mouse               |                                      |
|                              | (1:500, ab11959, Abcam)           | (1:500, A31571, Invitrogen)                |                                      |
|                              | Rabbit anti-FG antibody           | Alexa 594 donkey anti-rabbit               |                                      |
|                              | (1:500, AB153-I, Merck Millipore) | (1:500, A21207, Invitrogen)                |                                      |
| <b>Fos/eYFP/DAPI</b>         | Mouse anti-Fos                    | Alexa 594 donkey anti-mouse                | DAPI                                 |
|                              | (1:500, ab11959, Abcam)           | (1:500, A21203, Invitrogen)                | (1:500, sc-3598, Santacruz, TX, USA) |
| <b>FG/VGluT2 /Fos</b>        |                                   | Anti-digoxigenin sheep antibody            | FITC-Avidin                          |
|                              |                                   | (1:1500, 11-207-733-910, Roche Diagnostic, | (1:500, A-2001, Vectorlabs)          |
|                              |                                   | Basel, Switzerland)                        | Alexa 647-donkey anti-rabbit         |
|                              | VGluT2 riboprobes                 | Rabbit anti-FG antibody                    | (1:500, A31573, Invitrogen)          |
|                              |                                   | (1:1000, AB153-I, Merck Millipore)         | Alexa 594-donkey anti-mouse          |
|                              |                                   | Mouse anti-Fos antibody                    | (1:500, A21203, Invitrogen)          |
|                              |                                   | (1:500, ab11959, Abcam)                    |                                      |
| <b>eGFP/Fos/DAPI</b>         | Mouse anti-Fos                    | Alexa 594 donkey anti-mouse                | DAPI                                 |
|                              | (1:500, ab11959, Abcam)           | (1:500, A21203, Invitrogen)                | (1:500, sc-3598, Santacruz, TX, USA) |
| <b>Biocytin</b>              | 594-avidin                        |                                            |                                      |
|                              | (1:500, S11227, Invitrogen)       |                                            |                                      |

**Supplementary table 3.** The company names and serial number of drugs used in experiments

| Chemicals                          | Company names                | Serial Number |
|------------------------------------|------------------------------|---------------|
| 488-CTB                            | Invitrogen                   | A12924        |
| 488-Retrobeads                     | Lumafluor, New York, NY, USA | Cas:78G180    |
| 594-Retrobeads                     | Lumafluor New York, NY, USA  | R170          |
| 1-fluoro-2,4-dinitrobenzene (DNFB) | Sigma, MO, USA               | D1529         |
| Chloroquine (CQ)                   | Sigma, MO, USA               | C6628         |
| Clozapine N-oxide (CNO)            | Sigma, MO, USA               | C8032         |
| CTB                                | absin                        | abs80001      |
| Doxycycline (Dox)                  | Beyotime, China              | ST0398        |
| Fluoro-gold (FG)                   | Biotium, Hayward, CA, USA    | 80014         |
| Histamine (His)                    | Sigma, MO, USA               | H7250         |
